# Supplementary material for: Origins of direction selectivity in the primate retina
Source: PubMed Central journal article supplement (PMC9126974; doi:10.1038/s41467-022-30405-5), 2022-05-23
Supplement: 41467_2022_30405_MOESM3_ESM.pdf [file 41467_2022_30405_MOESM3_ESM.pdf]

## Reporting Summary

Nature Portfolio wishes to improve the reproducibility of the work that we publish. This form provides structure for consistency and transparency in reporting. For further information on Nature Portfolio policies, see our [Editorial Policies](#) and the [Editorial Policy Checklist](#).

### Statistics

For all statistical analyses, confirm that the following items are present in the figure legend, table legend, main text, or Methods section.

n/a Confirmed

- The exact sample size ( $n$ ) for each experimental group/condition, given as a discrete number and unit of measurement
- A statement on whether measurements were taken from distinct samples or whether the same sample was measured repeatedly
- The statistical test(s) used AND whether they are one- or two-sided  
*Only common tests should be described solely by name; describe more complex techniques in the Methods section.*
- A description of all covariates tested
- A description of any assumptions or corrections, such as tests of normality and adjustment for multiple comparisons
- A full description of the statistical parameters including central tendency (e.g. means) or other basic estimates (e.g. regression coefficient) AND variation (e.g. standard deviation) or associated estimates of uncertainty (e.g. confidence intervals)
- For null hypothesis testing, the test statistic (e.g.  $F$ ,  $t$ ,  $r$ ) with confidence intervals, effect sizes, degrees of freedom and  $P$  value noted  
*Give  $P$  values as exact values whenever suitable.*
- For Bayesian analysis, information on the choice of priors and Markov chain Monte Carlo settings
- For hierarchical and complex designs, identification of the appropriate level for tests and full reporting of outcomes
- Estimates of effect sizes (e.g. Cohen's  $d$ , Pearson's  $r$ ), indicating how they were calculated

*Our web collection on [statistics for biologists](#) contains articles on many of the points above.*

### Software and code

Policy information about [availability of computer code](#)

Data collection Scan Image Premium (VIDRIO Technology), custom software (Mac OS) for electrophysiological data acquisition and stimulus generation freely available upon request; NIH FIJI V.2.1 With TraKEM2 plugin, Dragonfly Version 2020 (Object Research Systems).

Data analysis MATLAB R2020a; Custom MATLAB programs for data analysis freely available upon request. SPSS Version 28.0; Neuron-C

For manuscripts utilizing custom algorithms or software that are central to the research but not yet described in published literature, software must be made available to editors and reviewers. We strongly encourage code deposition in a community repository (e.g. GitHub). See the Nature Portfolio [guidelines for submitting code & software](#) for further information.

### Data

Policy information about [availability of data](#)

All manuscripts must include a [data availability statement](#). This statement should provide the following information, where applicable:

- Accession codes, unique identifiers, or web links for publicly available datasets
- A description of any restrictions on data availability
- For clinical datasets or third party data, please ensure that the statement adheres to our [policy](#)

The data that support the findings of this study are available from the corresponding authors upon reasonable request.

## Field-specific reporting

Please select the one below that is the best fit for your research. If you are not sure, read the appropriate sections before making your selection.

Life sciences       Behavioural & social sciences       Ecological, evolutionary & environmental sciences

For a reference copy of the document with all sections, see [nature.com/documents/nr-reporting-summary-flat.pdf](https://www.nature.com/documents/nr-reporting-summary-flat.pdf)

## Life sciences study design

All studies must disclose on these points even when the disclosure is negative.

|                 |                                                                                                                                                                                                                                                                                                                                                                   |
|-----------------|-------------------------------------------------------------------------------------------------------------------------------------------------------------------------------------------------------------------------------------------------------------------------------------------------------------------------------------------------------------------|
| Sample size     | Although no statistical methods were used to predetermine sample size, we used appropriate statistical tests on data at given sample size to test statistical significance. Sample size was determined from the cell count for each experimental condition.                                                                                                       |
| Data exclusions | No data was excluded from this study.                                                                                                                                                                                                                                                                                                                             |
| Replication     | We replicated our results both within samples (recordings from single cells) and between samples (multiple cell samples). We then used appropriate statistical tests (e.g., Welch's F, Games-Howell post hoc test, paired/and unpaired t-tests) on the data set when the sample size were unequal in order to test statistical significance at given sample size. |
| Randomization   | There were no experimental groups assigned in this study.                                                                                                                                                                                                                                                                                                         |
| Blinding        | Blinding was not possible because the same experimenter ran both control and experimental conditions on a given cell sample. However in the case of connectomic reconstruction multiple annotators were used to independently verify "ground truth" electron microscopic reconstructions.                                                                         |

## Reporting for specific materials, systems and methods

We require information from authors about some types of materials, experimental systems and methods used in many studies. Here, indicate whether each material, system or method listed is relevant to your study. If you are not sure if a list item applies to your research, read the appropriate section before selecting a response.

### Materials & experimental systems

### Methods

| n/a                                 | Involved in the study                                           | n/a                                 | Involved in the study                           |
|-------------------------------------|-----------------------------------------------------------------|-------------------------------------|-------------------------------------------------|
| <input type="checkbox"/>            | <input checked="" type="checkbox"/> Antibodies                  | <input checked="" type="checkbox"/> | <input type="checkbox"/> ChIP-seq               |
| <input checked="" type="checkbox"/> | <input type="checkbox"/> Eukaryotic cell lines                  | <input checked="" type="checkbox"/> | <input type="checkbox"/> Flow cytometry         |
| <input checked="" type="checkbox"/> | <input type="checkbox"/> Palaeontology and archaeology          | <input checked="" type="checkbox"/> | <input type="checkbox"/> MRI-based neuroimaging |
| <input type="checkbox"/>            | <input checked="" type="checkbox"/> Animals and other organisms |                                     |                                                 |
| <input checked="" type="checkbox"/> | <input type="checkbox"/> Human research participants            |                                     |                                                 |
| <input checked="" type="checkbox"/> | <input type="checkbox"/> Clinical data                          |                                     |                                                 |
| <input checked="" type="checkbox"/> | <input type="checkbox"/> Dual use research of concern           |                                     |                                                 |

## Antibodies

|                 |                                                                                                                                                                                                                                                                                                                                                                                                                                                                                                                                                                                                         |
|-----------------|---------------------------------------------------------------------------------------------------------------------------------------------------------------------------------------------------------------------------------------------------------------------------------------------------------------------------------------------------------------------------------------------------------------------------------------------------------------------------------------------------------------------------------------------------------------------------------------------------------|
| Antibodies used | Antibody to Human Melanopsin; personally supplied by Dr. King-Wai Yau (Johns Hopkins University; coauthor on this study); antibodies are available from Dr. Yau upon request.<br>Other commercially available antibodies used:<br><ul style="list-style-type: none"> <li>• biotinylated anti-rhodamine (C# BA-0605, Vector Labs, Burlingame, CA</li> <li>• biotinylated goat anti-rabbit (BA-1000; Vector Labs, Burlingame, CA</li> <li>• goat anti-choline acetyltransferase (ChAT) antibodies (AB144P, Millipore)</li> <li>• secondary goat antibodies conjugated to Alexa488 (Invitrogen)</li> </ul> |
| Validation      | Antibody to Human Melanopsin was validated in detail: see Liao HW, Ren X, Peterson BB, Marshak DW, Yau KW, Gamlin PD, Dacey DM (2016) Melanopsin-expressing ganglion cells on macaque and human retinas form two morphologically distinct populations. J Comp Neurol 524:2845-2872.                                                                                                                                                                                                                                                                                                                     |

## Animals and other organisms

Policy information about [studies involving animals](#); [ARRIVE guidelines](#) recommended for reporting animal research

|                    |                                                                                                                         |
|--------------------|-------------------------------------------------------------------------------------------------------------------------|
| Laboratory animals | Tissues were acquired from Macaque fascicularis, nemestrina and mulatta adults of either sex in the age range 3-15 yrs. |
| Wild animals       | No wild animals were involved in this study.                                                                            |

Field-collected samples

This study did not involve samples which are collected from the field.

Ethics oversight

Animal tissues were acquired in accordance with protocols reviewed and approved by the University of Washington Institutional Animal Care and Use Committee.

Note that full information on the approval of the study protocol must also be provided in the manuscript.
